# Supplementary material
Source: HighWire-hosted journal article supplement (https://diabetes.diabetesjournals.org/content/suppl/2008/01/29/db07-1669)
Supplement: db071669onlineappendix_table_1.pdf [file db071669onlineappendix_table_1.pdf]

**Table 1. Clinical Characteristics of Eye Donors**

| <b>Sample</b> | <b>Age (yr)</b> | <b>Sex</b> | <b>Diabetes Duration (yr)</b> | <b>Retinal Pathology</b> | <b>Cause of Death</b> |
|---------------|-----------------|------------|-------------------------------|--------------------------|-----------------------|
| 1             | 62              | M          | -                             | none                     | Prostate CA           |
| 2             | 53              | M          | -                             | none                     | Colon CA              |
| 3             | 78              | F          | -                             | none                     | CVA                   |
| 4             | 36              | M          | -                             | none                     | MVC                   |
| 5             | 46              | M          | -                             | none                     | ACI                   |
| 6             | 67              | F          | 8                             | no known retinopathy     | CHF                   |
| 7             | 50              | M          | 8                             | no known retinopathy     | Cardiac Arrest        |
| 8             | 74              | F          | 20                            | no known retinopathy     | Other                 |
| 9             | 55              | M          | 1                             | no known retinopathy     | Cardiac Arrest        |

Postmortem human retinas were homogenized and used for Western Blot, Slot Blot, and immunoprecipitation analysis. CA, cancer; CVA, cerebrovascular accident; MVC, motor vehicle collision; ACI, acute coronary insufficiency; CHF, congestive heart failure.
