# Supplementary material
Source: HighWire-hosted journal article supplement (https://diabetes.diabetesjournals.org/content/suppl/2008/01/29/db07-1669)
Supplement: db071669onlineappendix_table_2.pdf [file db071669onlineappendix_table_2.pdf]

**Table 2. Effects of STZ-Induced Diabetes on Body Weight and Blood Glucose Levels in Control, Diabetic, Diabetic Treated with FeTPPS, and Control Treated with FeTPPS animals**

|               | <b>Animal group</b>      | <b>n</b> | <b>Start weight (g)</b> | <b>End weight (g)</b> | <b>Blood glucose (mg/dl)</b> |
|---------------|--------------------------|----------|-------------------------|-----------------------|------------------------------|
| <b>4 week</b> | <b>Control</b>           | 18       | 253.4 ± 6.9             | 382.6 ± 19.0          | 116.3 ± 11.8                 |
|               | <b>Control + FeTPPs</b>  | 5        | 285.3 ± 2.9             | 402.7 ± 13.1          | 124.7 ± 11.3                 |
|               | <b>Diabetic</b>          | 21       | 253.5 ± 4.3             | 284.5 ± 13.3          | 460.9 ± 13.9                 |
|               | <b>Diabetic + FeTPPs</b> | 18       | 253.4 ± 4.4             | 301.2 ± 13.8          | 467.1 ± 12.0                 |

Data are mean ± SE. Animals were made diabetic by a single STZ injection (60 mg/ kg) in freshly prepared 10 mmol/L sodium citrate buffer, pH 4.5.
